# Supplementary material for: Kirkwood correlation factors in liquid mixtures from an extended Onsager–Kirkwood–Fröhlich equation
Source: Royal Society of Chemistry journal article supplement (doi:10.1039/c1cp20142e), 2011-01-01
Supplement: c1cp20142e.pdf [file c1cp20142e.pdf]

### Electronic Supplementary Information

#### Kirkwood correlation factors in liquid mixtures from extended Onsager–Kirkwood–Fröhlich equation

João Carlos R. Reis and T. P. Iglesias

**Table S1.** Experimental values of density  $\rho$ , relative permittivity  $\epsilon_r$  and refractive index  $n_D$  for mixtures 2,2,2-trifluoroethanol(A)–monoglyme(B) as a function of mole fraction  $x_A$  at different temperatures  $T$

| $x_A$                  | $\rho/\text{g cm}^{-3}$ | $x_A$   | $\epsilon_r$ | $x_A$   | $n_D$   |
|------------------------|-------------------------|---------|--------------|---------|---------|
| $T = 288.15 \text{ K}$ |                         |         |              |         |         |
| 0.0522                 | 0.89130                 | 0.0490  | 8.49         | 0.0480  | 1.37872 |
| 0.1000                 | 0.90905                 | 0.1040  | 9.62         | 0.1004  | 1.37481 |
| 0.2103                 | 0.95185                 | 0.2123  | 11.92        | 0.1967  | 1.36736 |
| 0.3144                 | 0.99564                 | 0.3132  | 14.12        | 0.2951  | 1.35938 |
| 0.4242                 | 1.04539                 | 0.4196  | 16.46        | 0.3856  | 1.35172 |
| 0.5147                 | 1.08971                 | 0.5156  | 18.52        | 0.4965  | 1.34195 |
| 0.6169                 | 1.14377                 | 0.6219  | 20.69        | 0.5980  | 1.33273 |
| 0.7138                 | 1.20016                 | 0.7201  | 22.60        | 0.7014  | 1.32325 |
| 0.8037                 | 1.25749                 | 0.8133  | 24.41        |         |         |
| 0.9086                 | 1.33090                 | 0.9070  | 26.35        |         |         |
| 0.9527                 | 1.36346                 | 0.9544  | 27.46        |         |         |
| $T = 298.15 \text{ K}$ |                         |         |              |         |         |
| 0.0522                 | 0.88017                 | 0.05338 | 8.16         | 0.04796 | 1.37366 |
| 0.1000                 | 0.89772                 | 0.10620 | 9.23         | 0.10044 | 1.36976 |
| 0.2102                 | 0.94004                 | 0.20808 | 11.28        | 0.19665 | 1.36247 |
| 0.3144                 | 0.98334                 | 0.31962 | 13.55        | 0.29512 | 1.35475 |
| 0.4242                 | 1.03254                 | 0.41534 | 15.48        | 0.38557 | 1.34729 |
| 0.5147                 | 1.07638                 | 0.51929 | 17.55        | 0.49649 | 1.33763 |
| 0.6169                 | 1.12983                 | 0.62262 | 19.53        | 0.59803 | 1.32869 |
| 0.7138                 | 1.18560                 | 0.62468 | 19.57        |         |         |
| 0.8037                 | 1.24227                 | 0.72083 | 21.35        |         |         |
| 0.9086                 | 1.31479                 | 0.81347 | 23.04        |         |         |
| 0.9527                 | 1.34705                 | 0.90652 | 24.78        |         |         |
|                        |                         | 0.95429 | 25.73        |         |         |

**Table S2.** Experimental values of density  $\rho$ , relative permittivity  $\epsilon_r$  and refractive index  $n_D$  for mixtures 2,2,2-trifluoroethanol(A)–diglyme(B) as a function of mole fraction  $x_A$  at different temperatures  $T$

| $x_A$                  | $\rho/\text{g cm}^{-3}$ | $x_A$  | $\epsilon_r$ | $x_A$  | $n_D$   |
|------------------------|-------------------------|--------|--------------|--------|---------|
| $T = 288.15 \text{ K}$ |                         |        |              |        |         |
| 0.0463                 | 0.95939                 | 0.0499 | 8.48         | 0.0508 | 1.40679 |
| 0.0945                 | 0.97108                 | 0.0856 | 9.05         | 0.0951 | 1.40368 |
| 0.2003                 | 0.99849                 | 0.2008 | 10.92        | 0.1947 | 1.39627 |
| 0.2938                 | 1.02565                 | 0.3012 | 12.70        | 0.2998 | 1.38733 |
| 0.4002                 | 1.06032                 | 0.4407 | 15.37        | 0.3845 | 1.37936 |
| 0.5196                 | 1.10529                 | 0.5280 | 17.09        | 0.4978 | 1.36796 |
| 0.6113                 | 1.14521                 | 0.6085 | 18.68        | 0.5883 | 1.35827 |
| 0.7129                 | 1.19650                 | 0.6967 | 20.42        | 0.6881 | 1.34629 |
| 0.7881                 | 1.24049                 | 0.7913 | 22.39        | 0.7986 | 1.32908 |
| 0.8894                 | 1.30978                 | 0.8946 | 24.96        |        |         |
| 0.9402                 | 1.34918                 | 0.9503 | 26.72        |        |         |
| $T = 298.15 \text{ K}$ |                         |        |              |        |         |
| 0.0463                 | 0.94935                 | 0.0465 | 8.13         | 0.0508 | 1.40239 |
| 0.0950                 | 0.96086                 | 0.1010 | 8.91         | 0.0951 | 1.39935 |
| 0.2003                 | 0.98789                 | 0.1931 | 10.31        | 0.1947 | 1.39202 |
| 0.2938                 | 1.01467                 | 0.2932 | 12.03        | 0.2998 | 1.38313 |
| 0.4002                 | 1.04886                 | 0.3979 | 13.91        | 0.3845 | 1.37517 |
| 0.5196                 | 1.09318                 | 0.5059 | 15.90        | 0.4978 | 1.36374 |
| 0.6113                 | 1.13252                 | 0.5996 | 17.70        | 0.5883 | 1.35404 |
| 0.7129                 | 1.18304                 | 0.7031 | 19.69        | 0.6881 | 1.34214 |
| 0.7881                 | 1.22636                 | 0.7978 | 21.56        | 0.7986 | 1.32529 |
| 0.8894                 | 1.29456                 | 0.8957 | 23.61        |        |         |
| 0.9402                 | 1.33330                 | 0.9451 | 25.00        |        |         |

**Table S3.** Experimental values of density  $\rho$ , relative permittivity  $\epsilon_r$  and refractive index  $n_D$  for mixtures 2,2,2-trifluoroethanol(A)–triglyme(B) as a function of mole fraction  $x_A$  at different temperatures  $T$

| $x_A$                  | $\rho/\text{g cm}^{-3}$ | $x_A$  | $\epsilon_r$ | $x_A$  | $n_D$   |
|------------------------|-------------------------|--------|--------------|--------|---------|
| $T = 288.15 \text{ K}$ |                         |        |              |        |         |
| 0.0474                 | 0.99806                 | 0.0525 | 8.69         | 0.0499 | 1.42246 |
| 0.0774                 | 1.00326                 | 0.0995 | 9.29         | 0.1006 | 1.41932 |
| 0.1861                 | 1.02396                 | 0.1929 | 10.56        | 0.2046 | 1.41237 |
| 0.2941                 | 1.04778                 | 0.2918 | 12.01        | 0.3082 | 1.40436 |
| 0.3976                 | 1.07434                 | 0.3966 | 13.67        | 0.4011 | 1.39602 |
| 0.4987                 | 1.10497                 | 0.4879 | 15.28        | 0.5065 | 1.38502 |
| 0.5992                 | 1.14125                 | 0.5797 | 16.89        | 0.5953 | 1.37429 |
| 0.6943                 | 1.18269                 | 0.6982 | 19.15        | 0.6988 | 1.35959 |
| 0.7952                 | 1.23741                 | 0.7968 | 21.31        | 0.7979 | 1.34248 |
| 0.9001                 | 1.31052                 | 0.8968 | 24.11        | 0.8988 | 1.32054 |
| 0.9499                 | 1.35226                 | 0.9494 | 26.17        |        |         |

| $T = 298.15 \text{ K}$ |         |        |       |        |         |
|------------------------|---------|--------|-------|--------|---------|
| 0.0474                 | 0.98844 | 0.0475 | 8.35  | 0.0499 | 1.41807 |
| 0.0774                 | 0.99358 | 0.0986 | 8.96  | 0.1006 | 1.41492 |
| 0.1861                 | 1.01394 | 0.1963 | 10.23 | 0.2046 | 1.40800 |
| 0.2941                 | 1.03741 | 0.3093 | 11.80 | 0.3082 | 1.40015 |
| 0.3976                 | 1.06353 | 0.3908 | 13.02 | 0.4011 | 1.39198 |
| 0.4987                 | 1.09369 | 0.4961 | 14.75 | 0.5065 | 1.38110 |
| 0.5992                 | 1.12939 | 0.5958 | 16.48 | 0.5953 | 1.37035 |
| 0.6943                 | 1.17016 | 0.6921 | 18.27 | 0.6988 | 1.35557 |
| 0.7953                 | 1.22395 | 0.7941 | 20.35 | 0.7979 | 1.33863 |
| 0.9001                 | 1.29568 | 0.8986 | 22.84 |        |         |
| 0.9499                 | 1.33653 | 0.9479 | 24.55 |        |         |

**Table S4.** Experimental values of density  $\rho$ , relative permittivity  $\epsilon_r$  and refractive index  $n_D$  for mixtures 2,2,2-trifluoroethanol(A)–tetraglyme(B) as a function of mole fraction  $x_A$  at different temperatures  $T$

| $x_A$                  | $\rho/\text{g cm}^{-3}$ | $x_A$  | $\epsilon_r$ | $x_A$  | $n_D$   |
|------------------------|-------------------------|--------|--------------|--------|---------|
| $T = 288.15 \text{ K}$ |                         |        |              |        |         |
| 0.0701                 | 1.02534                 | 0.0488 | 8.78         | 0.0505 | 1.43175 |
| 0.1224                 | 1.03282                 | 0.0965 | 9.29         | 0.0988 | 1.42966 |
| 0.2322                 | 1.05057                 | 0.1940 | 10.37        | 0.1971 | 1.42397 |
| 0.3331                 | 1.06987                 | 0.2914 | 11.60        | 0.3134 | 1.41521 |
| 0.4296                 | 1.09179                 | 0.3967 | 13.07        | 0.4086 | 1.40672 |
| 0.5406                 | 1.12247                 | 0.4981 | 14.52        | 0.4978 | 1.39771 |
| 0.6352                 | 1.15506                 | 0.5941 | 16.12        | 0.5997 | 1.38581 |
| 0.7429                 | 1.2025                  | 0.6989 | 18.21        | 0.7007 | 1.37133 |
| 0.8240                 | 1.24868                 | 0.8017 | 20.60        | 0.8017 | 1.35244 |
| 0.9150                 | 1.31667                 | 0.8985 | 23.49        | 0.9020 | 1.32676 |
| 0.9567                 | 1.35503                 | 0.9491 | 25.67        |        |         |
| $T = 298.15 \text{ K}$ |                         |        |              |        |         |
| 0.0701                 | 1.01591                 | 0.0526 | 8.29         | 0.0505 | 1.42805 |
| 0.1224                 | 1.02328                 | 0.1012 | 8.76         | 0.0988 | 1.42550 |
| 0.2322                 | 1.04075                 | 0.2002 | 9.82         | 0.1971 | 1.41959 |
| 0.3331                 | 1.05971                 | 0.2981 | 11.01        | 0.3134 | 1.41111 |
| 0.4296                 | 1.08128                 | 0.4036 | 12.42        | 0.4086 | 1.40284 |
| 0.5406                 | 1.11144                 | 0.5059 | 13.99        | 0.4978 | 1.39389 |
| 0.6352                 | 1.14347                 | 0.6002 | 15.59        | 0.5997 | 1.38189 |
| 0.7429                 | 1.19007                 | 0.6992 | 17.51        | 0.7007 | 1.36727 |
| 0.8240                 | 1.23540                 | 0.8014 | 19.73        | 0.8017 | 1.34843 |
| 0.9150                 | 1.30197                 | 0.8973 | 22.15        | 0.9020 | 1.32326 |
| 0.9567                 | 1.33942                 | 0.9471 | 24.00        |        |         |
